# Supplementary material
Source: PubMed Central journal article supplement (PMC3445307)
Supplement: supp_139.20.3752_DEV074203SUPPDATA.pdf [file supp_139.20.3752_DEV074203SUPPDATA.pdf]

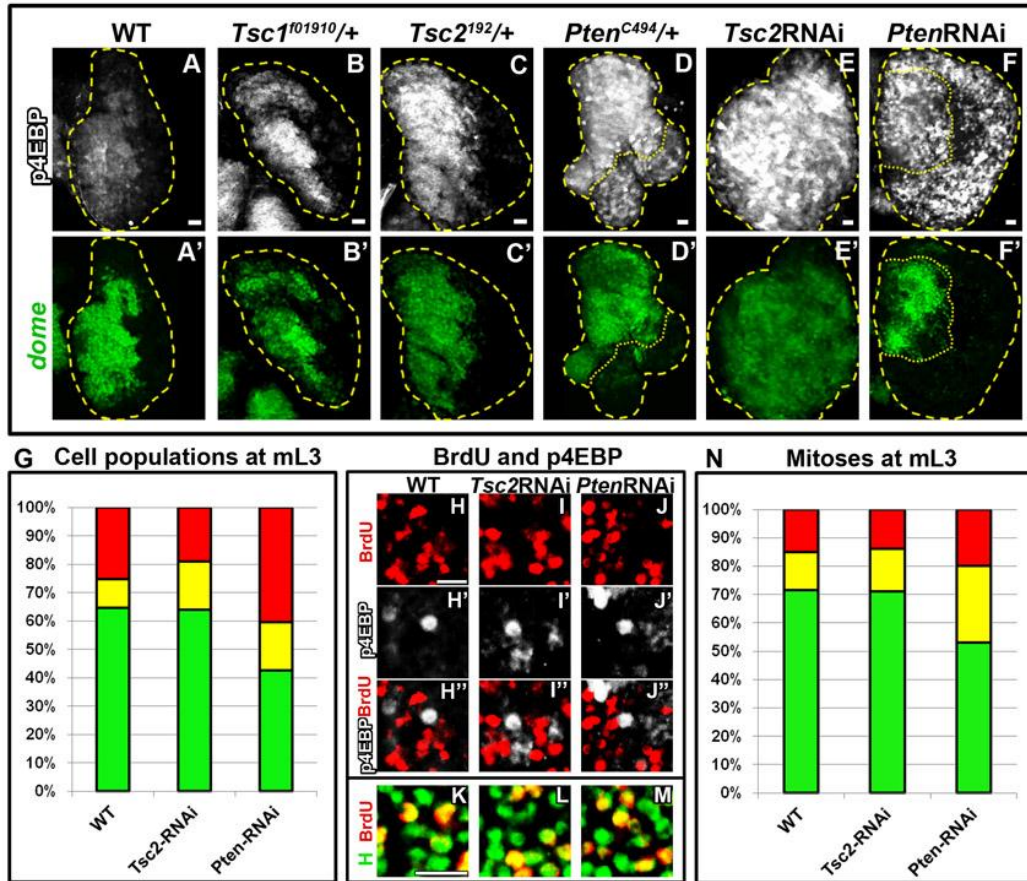

**Fig. S1. Expression of p4EBP, cell population distributions and mitoses upon disruption of *Tsc1/2* and *Pten* function.** (A-F9) Increase in p4EBP expression upon TORC1 pathway manipulation at mL3. Single-copy loss of *Tsc1* (*Tsc1*<sup>l01910/+</sup>) (B,B9) or *Tsc2* (*Tsc2*<sup>l92/+</sup>) (C,C9) increases p4EBP expression (white) in *dome*<sup>+</sup> hemocyte progenitors (green), compared with WT (A,A9). Single-copy loss of *Pten* (*Pten*<sup>C494/+</sup>) (D,D9) increases p4EBP expression both within *dome*<sup>+</sup> and *dome*<sup>-</sup> hemocytes. Downregulation of *Tsc2* (*dome*>*Tsc2*RNAi; E,E9) in hemocyte progenitors autonomously increases p4EBP expression in *dome*<sup>low</sup> hemocytes throughout the LG. Downregulation of *Pten* (*dome*>*Pten*RNAi, F,F9) increases p4EBP autonomously within *dome*<sup>+</sup> hemocytes and non-cell-autonomously in *dome*<sup>-</sup> hemocytes. (G) Hemocyte and progenitor cell distributions at mL3 among the populations of *dome*<sup>+</sup>/PXN<sup>-</sup> prohemocytes (PH, green), *dome*<sup>+</sup>/PXN<sup>+</sup> intermediate progenitors (IP, yellow), and *dome*<sup>-</sup>/PXN<sup>+</sup> differentiated hemocytes (DH, red). WT LGs are composed of 65±5% PH, 10±3% IP and 25±5% DH. *Tsc2* downregulation in progenitors does not affect prohemocyte population size at mL3: 64±5% of the LG represents PH, whereas 17±3% of cells are IP and 19±6% are DH. *Pten* deficiency increases differentiation at the cost of prohemocytes: 43±8% of the LG represents PH, whereas 17±4% are IP and 40±9% are DH. Data are mean ± s.d. (n=10). Two-way ANOVA statistics showed significant changes ( $P < 0.0001$ ) in the distribution of hemocyte populations in *Tsc2*- or *Pten*-deficient LGs compared with WT at mL3. (H-M) Bromodeoxyuridine (BrdU, red) incorporation in WT (*dome*>*gal4*) (H-H0,K), *dome*>*Tsc2*RNAi (I-I0,L) and *dome*>*Pten*RNAi (J-J0,M) LGs at eL2. BrdU, a marker of cells in S phase, does not colocalize with p4EBP<sup>high</sup> cells in any backgrounds (H-J0). Histone (H, green), a nuclear marker, overlaps with BrdU (red), indicating nuclear localization of BrdU (K-M). (N) Distribution of mitoses in mL3 LGs among the populations of *dome*<sup>+</sup>/PXN<sup>-</sup> prohemocytes (PH, green), *dome*<sup>+</sup>/PXN<sup>+</sup> intermediate progenitors (IP, yellow) and *dome*<sup>-</sup>/PXN<sup>+</sup> differentiated hemocytes (DH, red). In WT, 71.5±1.8% of mitoses occur in PH, whereas 13.5±3.4% occur in IP and 15±2.5% in DH. *Tsc2* downregulation does not affect the proportion of mitoses that occur in PH: 71±6.6% of mitoses occur within PH, whereas 15±5.3% occur in IP and 13.9±5.3% of mitoses occur in DH. By contrast, *Pten* downregulation decreases the proportion of mitoses in PH to 53.1±5.8%, whereas 27.1±5.3% of mitoses occur in IP and 19.8±7% in DH. Data are mean ± s.d. (n=10). Two-way ANOVA statistics comparing the distribution of mitoses at mL3 in *Tsc2*- and *Pten*-deficient LGs compared with WT showed no difference for *Tsc2*-RNAi LGs ( $P > 0.05$ ), but a significant change upon *Pten* deficiency ( $P < 0.0001$ ). Scale bars: 20 μm in A-F; 10 μm in H-M.

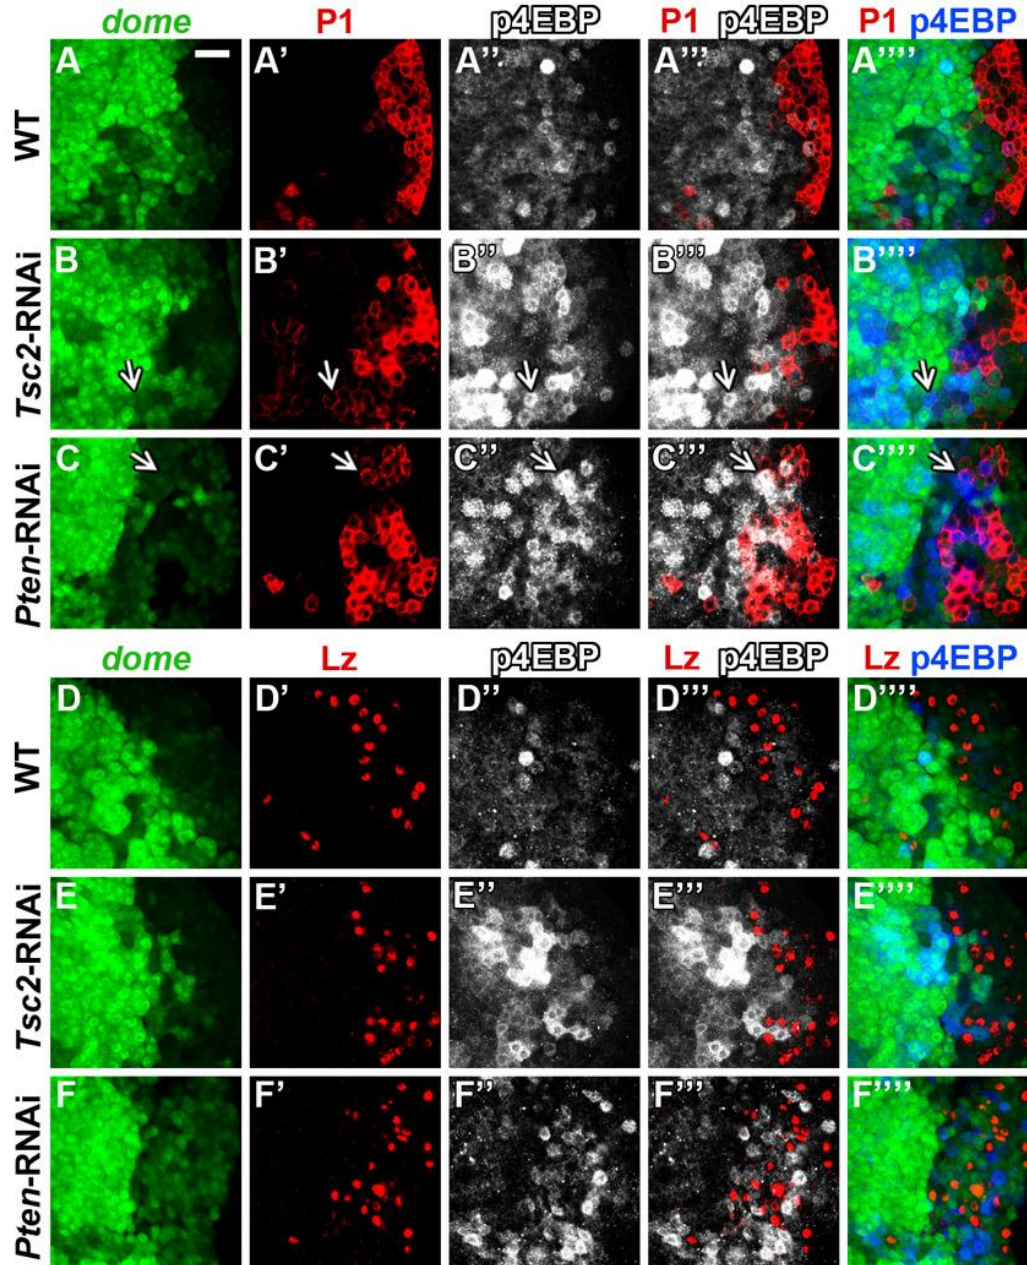

**Fig. S2. Distribution of p4EBP<sup>high</sup> cells in *Tsc2*- and *Pten*-deficient LGs at mL3.** All panels represent mL3 LGs. p4EBP is shown in white in columns 3 and 4 and in blue in column 5. P1 (A-C-9) labels differentiated PLs, and LZ (D-F-9) labels CCs and their progenitors. L1<sup>+</sup> lamellocytes were not observed at this stage in any of the genetic backgrounds. (A-A-9, D-D-9) WT. p4EBP is expressed throughout the primary lobe at low levels with some scattered p4EBP<sup>high</sup> cells. A small population of P1<sup>+</sup> (A-A-9) and LZ<sup>+</sup> (D-D-9) hemocytes is present. (B-B-9, E-E-9) Downregulation of *Tsc2* (*dome>Tsc2RNAi*) expands the population of p4EBP<sup>high</sup> cells. Rare p4EBP<sup>high</sup> cells colocalize with P1<sup>low</sup> (B-B-9) hemocytes (arrows), but not with P1<sup>high</sup> hemocytes or with LZ<sup>+</sup> cells (E-E-9). (C-C-9, F-F-9) Downregulation of *Pten* (*dome>PtenRNAi*) expands the population of p4EBP<sup>high</sup> cells. A subset of P1<sup>+</sup> hemocytes (arrows, C-C-9) are p4EBP<sup>high</sup>, including some P1<sup>high</sup> cells. LZ<sup>+</sup> cells are often observed adjacent to p4EBP<sup>high</sup> cells but they do not overlap (F-F-9). Scale bar: 20  $\mu$ m.

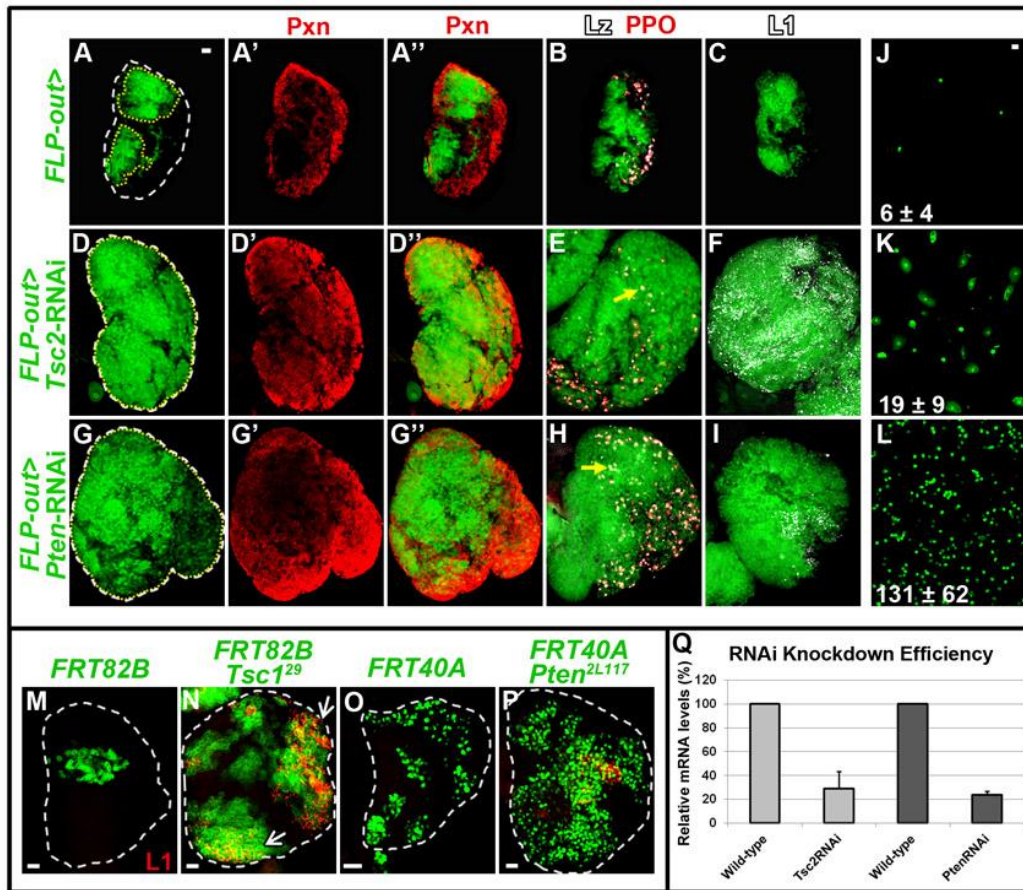

**Fig. S3. Clonal analysis and knockdown efficiencies of *Tsc2*RNAi and *Pten*RNAi.** Clones are demarcated in yellow in A,D,G. (A-C) WT LGs (*FLP-out>*): clonal expression of GFP (green) and normal expression of differentiation markers Pxn (red, A',A''), PPO (red, B), LZ (white, B) and L1 (white, C; not normally present in WT). (D-F) Clonal expression of *Tsc2*RNAi (*FLP-out>Tsc2*RNAi) increases LG size and GFP-marked clones encompass the entire LG lobe (compare with A-C). Pxn (D',D'') and L1 (F) expression expands throughout the LG. A small number of LZ<sup>+</sup>/PPO<sup>-</sup> CC progenitors (arrow) are also seen in medial regions of the LG (E), unlike in WT. (G-I) Clonal expression of *Pten*RNAi (*FLP-out>Tsc2*RNAi) increases LG size and increases differentiation (G'-I) with few lamellocytes observed (I). (J-L) Hemocyte bleeds from LG-specific lineage-traced larvae. GFP marks hemocytes in circulation that are derived from the LG. Very few LG-derived GFP<sup>+</sup> hemocytes are observed in circulation in WT (J). Downregulation of *Tsc2* in the LG induces the release of LG-derived hemocytes, particularly lamellocytes, into circulation (K). Downregulation of *Pten* in the LG increases the relative number of LG-derived hemocytes, but not lamellocytes, released into circulation (L) compared with WT ( $P < 0.001$ ; J) or *Tsc2* downregulation ( $P < 0.001$ ; K). Data are mean  $\pm$  s.d.,  $n = 10$ . (M-P) All panels represent wL3. MARCM clones for WT [*hs-flp FRT82B Tub-mCD8-GFP* (M) and *hs-flp FRT40A Tub-nGFP* (O)], *Tsc1*<sup>29</sup> [*hs-flp FRT82B Tsc1*<sup>29</sup> *FRT82B Tub-mCD8-GFP* (N) and *hs-flp FRT40A Pten*<sup>2L117</sup> *FRT40A Tub-nGFP* (P)]. In WT, lamellocytes (red) are not observed (M,O). *Tsc1*<sup>-/-</sup> clones autonomously induce lamellocyte differentiation (arrows, N). *Pten*<sup>-/-</sup> clones induce a small number of lamellocytes (P). (Q) Knockdown efficiency of *Tsc2*RNAi and *Pten*RNAi constructs. Quantitative RT-PCR was performed to assess the relative levels of *Tsc2* or *Pten* at wL3, following ubiquitous expression of their respective RNAi constructs with *daughterless-Gal4*. Data are the mean of three replicates  $\pm$  s.d. *Tsc2* mRNA transcripts were detected at 29.02% of WT, and *Pten* mRNA transcripts were detected at 23.88% of WT. Scale bars: 20  $\mu$ m; except for 1.23 magnification for I.

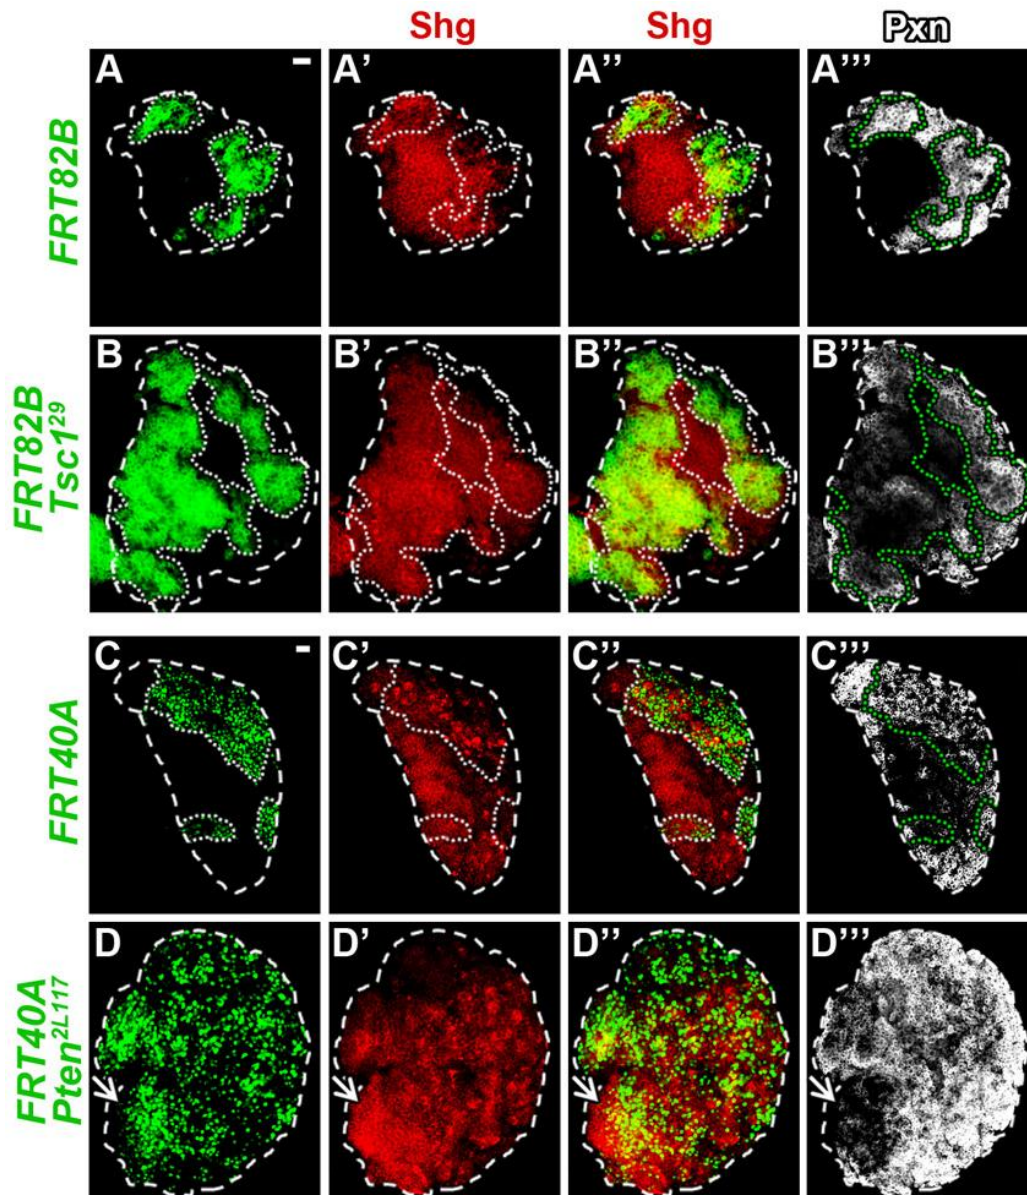

**Fig. S4. Shotgun expression in *Tsc1* and *Pten* LOF backgrounds.** All panels represent wL3. Clones are outlined by a white or green dotted line. (A-B-) *Tsc* MARCM clones. (A-A-) WT MARCM clones (*hs-flp FRT82B Tub-mCD8-GFP*). (B-B-) *Tsc1*<sup>29</sup> clones (*hs-flp FRT82B Tsc1*<sup>29</sup> *FRT82B Tub-mCD8-GFP*) maintain Shotgun (SHG, DE-cadherin) expression (red) in *Tsc1*<sup>-/-</sup> clones (green). High PXN expression (white) is observed only at the tissue periphery, while *Tsc1*<sup>-/-</sup> cells express low PXN levels (gray, B-). (C-D-) *Pten* MARCM clones. (C-C-) WT MARCM clones (*hs-flp FRT40A Tub-nGFP*) express highest SHG expression in medial, PXN-negative tissue. Cells in the periphery are differentiated and express reduced SHG levels, except for non-specific expression of SHG in scattered cells. (D-D-) *Pten*<sup>2L117</sup> clones (*hs-flp FRT40A Pten*<sup>2L117</sup> *FRT40A Tub-nGFP*) that are medially localized (arrow) are PXN negative and express high SHG levels. Scattered *Pten*<sup>-/-</sup> cells in the periphery are PXN<sup>high</sup> (white) and express reduced levels of SHG, except for some scattered cells. Scale bars: 20  $\mu$ m.

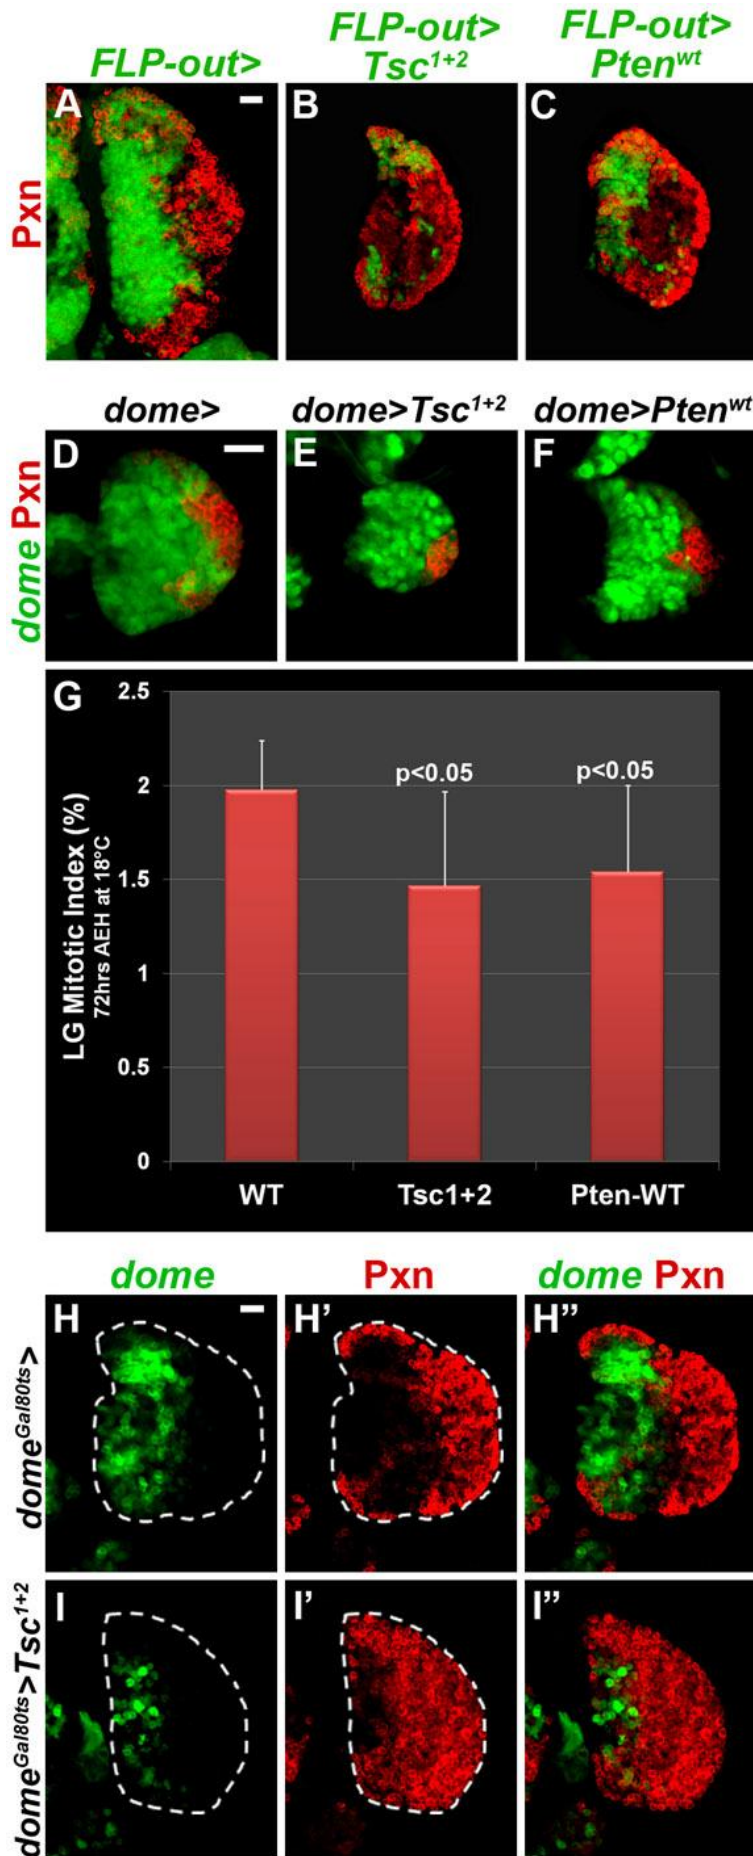

**Fig. S5. Inhibition of TORC1 signaling in prohemocytes impairs early LG growth.** (A-C) FLP-out clones were generated specifically in the LG for WT (*FLP-out*>; A), *Tsc<sup>l+2</sup>* (*FLP-out*> *Tsc<sup>l+2</sup>*; B) and *Pten<sup>wt</sup>* (*FLP-out*> *Pten<sup>wt</sup>*; C). Clonal overexpression of *Tsc<sup>l+2</sup>* (B) or *Pten<sup>wt</sup>* (C) reduces overall LG size at wL3 and increases the population of PXN<sup>+</sup> hemocytes (red). (D-F) Overexpression of *Tsc<sup>l+2</sup>* (E) and *Pten<sup>wt</sup>* (F) in prohemocytes decreases overall LG size at IL2, compared with WT (*dome*>, D), but the onset of differentiation of a small number of PXN<sup>+</sup> (red) hemocytes at the LG periphery occurs normally. Staging of *dome*>*Tsc<sup>l+2</sup>* and *dome*>*Pten<sup>wt</sup>* was performed at 18°C and IL2 larvae were dissected at 72 hours AEH. (G) Quantification of mitotic index at IL2. Overexpression of *Tsc<sup>l+2</sup>* ( $1.47 \pm 0.5\%$ ,  $P < 0.0001$ ) or *Pten<sup>wt</sup>* ( $1.54 \pm 0.46\%$ ,  $P < 0.0001$ ) in prohemocytes decreases mitotic index, compared with WT ( $1.98 \pm 0.26\%$ ). Data are mean  $\pm$  s.d.,  $n=10$ . (H-I0) Delaying expression of *Tsc<sup>l+2</sup>* in prohemocytes until eL3 does not alter LG size (compare I0 with H0) but increases the number of PXN<sup>+</sup> differentiated hemocytes (red). Late expression of *UAS-Tsc<sup>l+2</sup>* in progenitors was induced using *dome-gal4; P[tubP-gal80[ts]]20* and shifting larvae to the restrictive temperature (29°C) at eL3. Scale bars: 20  $\mu$ m (for each row).

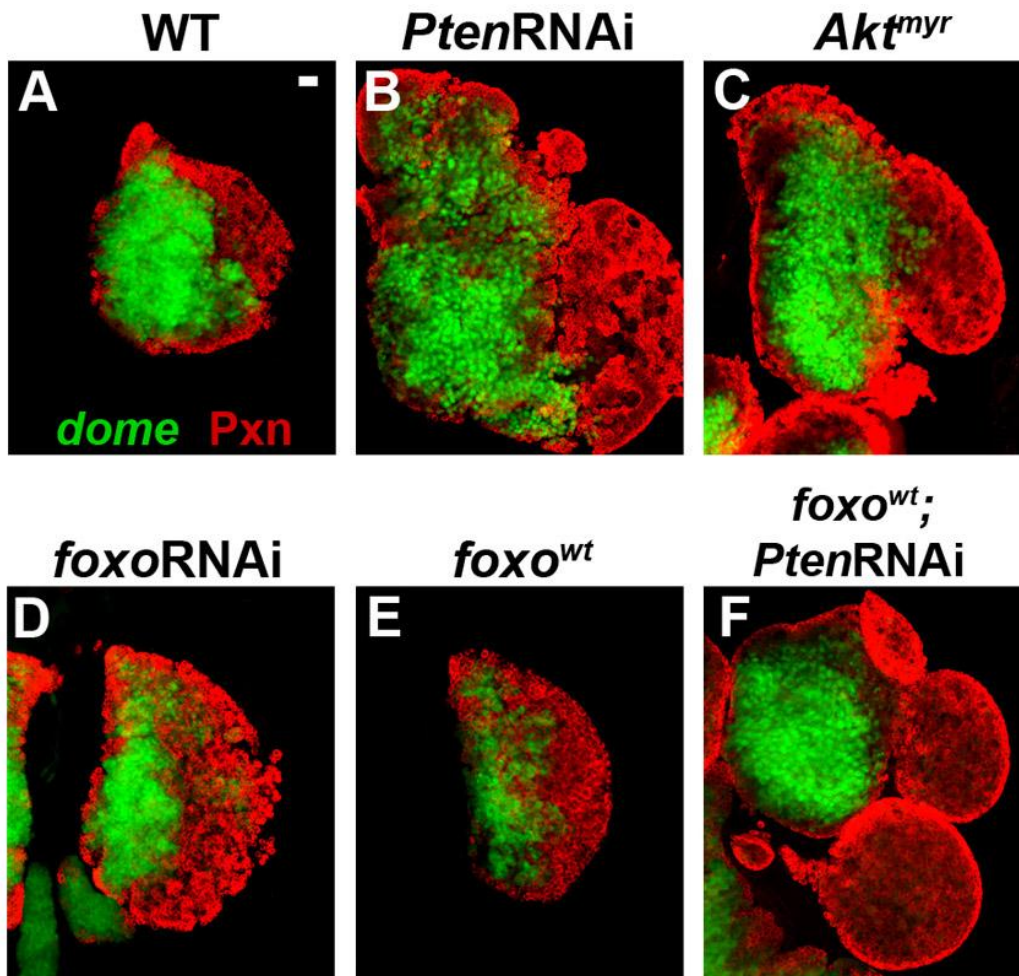

**Fig. S6. FOXO-independent role of AKT in mediating *Pten* LOF phenotypes.** All panels represent wL3 LGs. In all panels, *dome-gal4; UAS-2xEGFP* (green) drives expression of the genetic constructs listed. PXN expression is in red. (A) WT LG. (B) *Pten* downregulation in prohemocytes increases LG size and expands the population of PXN<sup>+</sup> hemocytes. (C) Overexpression of activated *Akt* (*Akt<sup>myr</sup>*) increases the population of PXN<sup>+</sup> hemocytes, which sometimes ‘bud’ at the LG periphery. (D) Downregulation of *foxo* in prohemocytes does not phenocopy *Akt<sup>myr</sup>* overexpression (C) or *Pten* downregulation (B) in the LG. (E) Overexpression of *foxo* increases PXN<sup>+</sup> hemocytes at the expense of prohemocytes. (F) Overexpression of *foxo* upon *Pten* downregulation does not rescue the accumulation of differentiated hemocytes associated with *Pten* deficiency (B). Scale bar: 20  $\mu$ m.
